# Supplementary material for: Enzymatic production of deoxyguanosine triphosphate from waste DNA by a recombinant guanylate kinase expressed in Escherichia coli BL21(DE3)
Source: Research Square preprint supplement (doi:10.21203/rs.3.rs-8714799/v1), 2026-02-04
Supplement: Supplementary file 1 [file 04d61bdd307e446679d0a9b6.docx]

Table 1: Comparison of dGTP concentrations obtained from different DNA substrates following enzymatic phosphorylation.

| **DNA substrate / Pretreatment** | **dGTP concentration (µM)** | **Relative contribution (%)** |
| --- | --- | --- |
| Genomic DNA + ExoIII/Benzonase | 1.719 ± 0.178 | 39.1 |
| Waste DNA + S1 nuclease | 1.416 ± 0.025 | 32.3 |
| Genomic DNA + S1 nuclease | 1.155 ± 0.034 | 26.3 |
