# Supplementary material for: Enzymatic production of deoxyguanosine triphosphate from waste DNA by a recombinant guanylate kinase expressed in Escherichia coli BL21(DE3)
Source: Research Square preprint supplement (doi:10.21203/rs.3.rs-8714799/v1), 2026-02-04
Supplement: Supplementary file 2 [file fa97eae2b5c64282e73f0208.docx]

Table 2: Comparative overview of enzymatic and biocatalytic strategies for nucleotide production

| **Reference** | **Enzyme / System** | **Substrate Source** | **Production Scale** | **Yield / Key Outcome** | **Strategic Innovation** |
| --- | --- | --- | --- | --- | --- |
| **This Study** | Recombinant GUK1 (*E. coli*)  ATP Regeneration (PK/PEP) | Waste DNA | Preparative | 1.416 µM (dGTP) | Sustainable "Waste-to-Wealth" model with high specificity |
| [**Bird et al. (2024)**](https://doi.org/10.1016/j.tibtech.2024.12.003) | Integrated Kinase Networks | Commercial dNMPs | Analytical | Systematic dNTP balance | Regulation mechanisms of nucleotide pool homeostasis. |
| [**Tang et al. (2023)**](https://pubs.acs.org/doi/10.1021/acs.oprd.3c00405) | Recombinant Biocatalysts | Synthetic Precursors | Industrial Pilot | High Stability | Enzyme immobilization for continuous-flow dNTP synthesis. |
| [**Li et al. (2023)**](https://doi.org/10.1093/jimb/kuad012) | ATP Regeneration (PK/PEP) | NMP/NDP mix | Preparative | >95% Conversion | Cost-effective energy recycling in multi-step cascades. |
| | [**Yamanè & Shimizu (2005)**](https://link.springer.com/chapter/10.1007/BFb0006382) | | --- |  |  | | --- | | | Fed-batch bioprocess | | --- | | | Microbial substrates | | --- | | | Preparative | | --- | | | Scalable production | | --- | | Process optimization for industrial scale-up |
| | [**Mathews et al. (1998)**](https://www.sciencedirect.com/science/article/abs/pii/S0022283698918678?via%3Dihub) | | --- |  |  | | --- |  |  | | --- | | Nuclease–kinase pathways | | Cellular DNA | | --- | | Laboratory | | Nucleotide salvage | | --- | | Biochemical basis of nucleotide recovery pathways |
| | [**Stehle & Schulz (1990)**](https://www.sciencedirect.com/science/article/abs/pii/002228369090024G?via%3Dihub) | | --- |  |  | | --- |  |  | | --- | | Guanylate kinase (GUK) | | dGMP | | --- | | | Basic research | | --- | | | Mechanistic insight | | --- | | Structural basis of GUK substrate specificity |
